# Supplementary material
Source: PubMed Central journal article supplement (PMC6944292)
Supplement: NIHMS1064853-supplement-Fig_s1.pdf [file NIHMS1064853-supplement-Fig_s1.pdf]

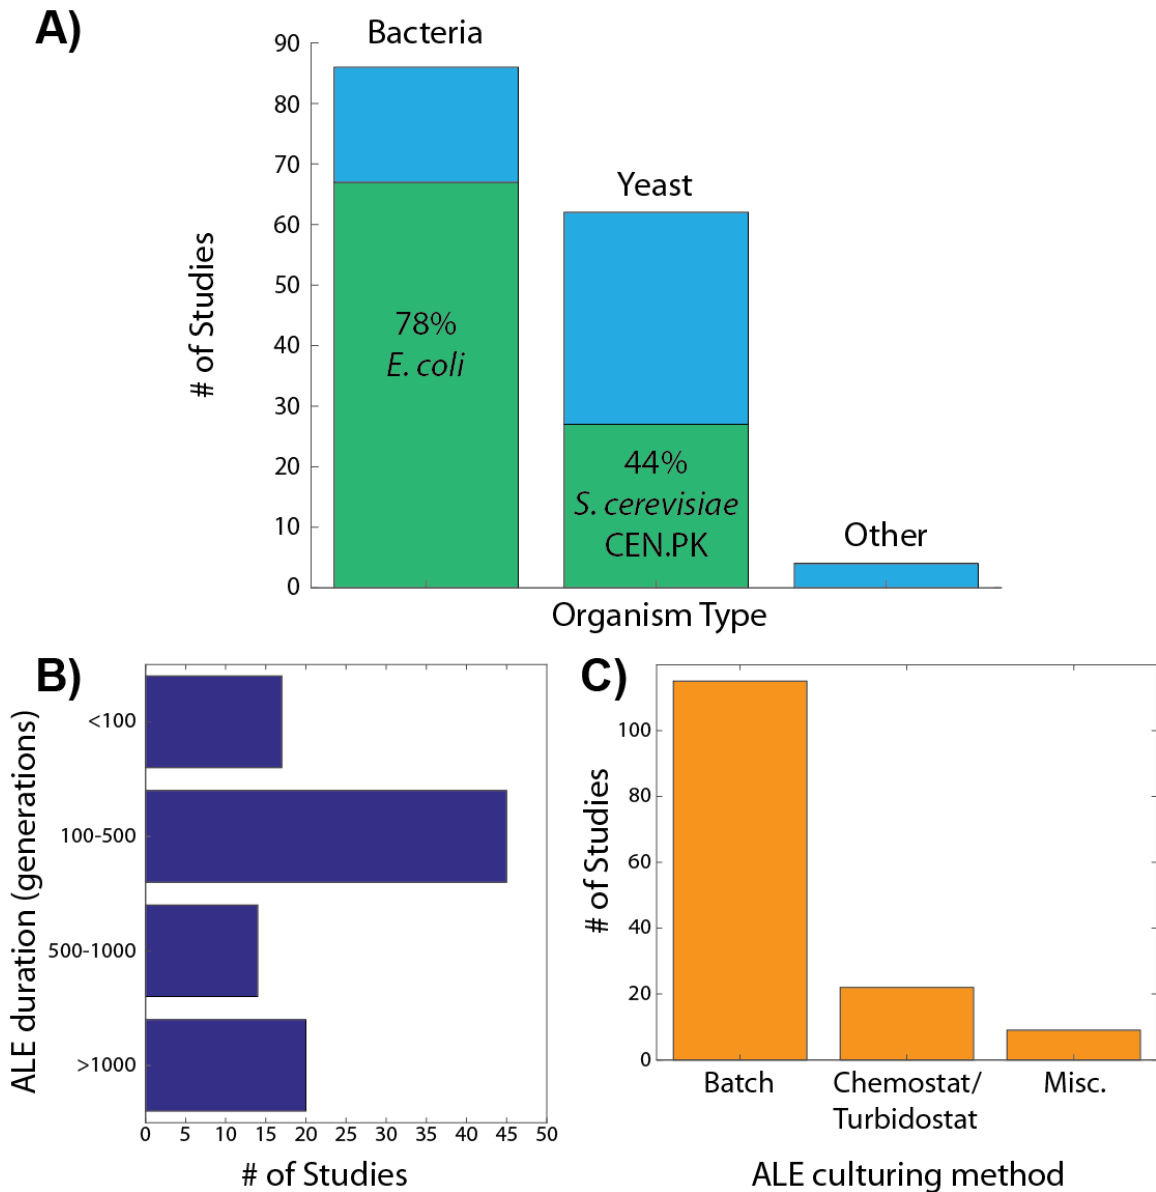

**Supplemental Figure 1.** Categorization of species utilized, timescales of evolution, and experimental culturing setups used in ALE studies. (A) Organisms subjected to evolution in the collected studies were predominantly *Escherichia coli* and *Saccharomyces cerevisiae* (B) Distribution of the evolutionary timescales employed across the collected studies (C) Culturing methods used in ALE experiments were dominated by batch culturing, but chemostats/turbidostats also had non-negligible frequency
